# Supplementary material for: Sustainable and rapid preparation of nanosized Fe/Ni-pentlandite particles by mechanochemistry
Source: PubMed Central journal article supplement (PMC8163287; doi:10.1039/d0sc04525j), 2020-11-05
Supplement: SC-011-D0SC04525J-s001.pdf [file SC-011-D0SC04525J-s001.pdf]

# Sustainable and Rapid Preparation of Nanosized Fe/Ni-Pentlandite Particles by Mechanochemistry

## SUPPORTING INFORMATION

David Tetzlaff<sup>a,b,†</sup>, Kevinjeorjios Pellumbi<sup>b,†</sup>, Daniel M. Baier<sup>b</sup>, Lucas Hoof<sup>a</sup>, Harikumar Shastry Barkur<sup>b</sup>, Mathias Smialkowski<sup>b</sup>, Hatem M. A. Amin<sup>b,c</sup>, Sven Grätz<sup>b</sup>, Daniel Siegmund<sup>a</sup>, Lars Borchardt<sup>b</sup> and Ulf-Peter Apfel<sup>\*a,b</sup>

a) Fraunhofer UMSICHT, Osterfelder Straße 3, DE-46047 Oberhausen, Germany

b) Ruhr University Bochum, Inorganic Chemistry I, Universitätsstraße 150, DE-44780 Bochum, Germany

c) Cairo University, Chemistry Department, 1 Gamaa St., EG-12613 Giza, Egypt

† These authors contributed equally to this work.

### Corresponding author.

\*Email: [ulf.apfel@rub.de](mailto:ulf.apfel@rub.de) or [ulf.apfel@umsicht.fraunhofer.de](mailto:ulf.apfel@umsicht.fraunhofer.de)

\*Email: [lars.borchardt@rub.de](mailto:lars.borchardt@rub.de)

## Contents

|                                                                                                                                                      |    |
|------------------------------------------------------------------------------------------------------------------------------------------------------|----|
| Phase analysis of the synthesized Pn materials .....                                                                                                 | 4  |
| Rietveld analysis of the synthesized Pn materials .....                                                                                              | 5  |
| Differential Scanning Calorimetry of the synthesized Pn materials.....                                                                               | 6  |
| Phase transitions of the synthesized Pn materials from the elemental reactants according to Differential Scanning Calorimetry .....                  | 7  |
| Phase transitions of the synthesized Pn materials from the sulfidic reactants according to Differential Scanning Calorimetry.....                    | 8  |
| Differential Scanning Calorimetry analysis of an unreacted elemental reaction mixture ....                                                           | 9  |
| Scanning Electron Microscopy of the synthesized Pn materials from an elemental reaction mixture.....                                                 | 10 |
| Scanning Electron Microscopy of the synthesized Pn materials from a sulfidic reaction mixture.....                                                   | 11 |
| Disc centrifuge measurements of the synthesized materials .....                                                                                      | 12 |
| Particle size analysis of the synthesized Pn materials prepared through an elemental reaction mixture .....                                          | 13 |
| Particle size analysis of the synthesized Pn materials prepared through a sulfidic reaction mixture.....                                             | 14 |
| Non-noble metal HER electrocatalysts in a PEM electrolyzer reports in literature .....                                                               | 15 |
| Zr quantification through PIXE.....                                                                                                                  | 16 |
| EDX mapping analysis of the synthesized Pn materials prepared through an elemental reaction mixture using six ZrO <sub>2</sub> milling balls .....   | 17 |
| EDX mapping analysis of the synthesized Pn materials prepared through an elemental reaction mixture using eight ZrO <sub>2</sub> milling balls ..... | 18 |
| EDX mapping analysis of the synthesized Pn materials prepared through an elemental reaction mixture using ten ZrO <sub>2</sub> milling balls.....    | 19 |
| EDX mapping analysis of the synthesized Pn materials prepared through a sulfidic reaction mixture using six ZrO <sub>2</sub> milling balls .....     | 20 |
| EDX mapping analysis of the synthesized Pn materials prepared through a sulfidic reaction mixture using eight ZrO <sub>2</sub> milling balls .....   | 21 |
| EDX mapping of the synthesized Pn materials prepared through a sulfidic reaction mixture using ten ZrO <sub>2</sub> milling balls .....              | 22 |
| Gas and Temperature monitoring in the milling vessel starting from elemental and sulfidic reactant mixtures.....                                     | 23 |
| PXRDs of the synthesized Pn materials generated through the Gas and Temperature monitoring experiments .....                                         | 24 |
| Raman investigation of the S <sub>8</sub> -Y samples.....                                                                                            | 25 |
| Electrochemical cell for PEM investigation.....                                                                                                      | 26 |

|                                                                                 |    |
|---------------------------------------------------------------------------------|----|
| Electrochemical HER using the synthesized materials in a PEM electrolyzer ..... | 27 |
| References .....                                                                | 28 |

## Phase analysis of the synthesized Pn materials

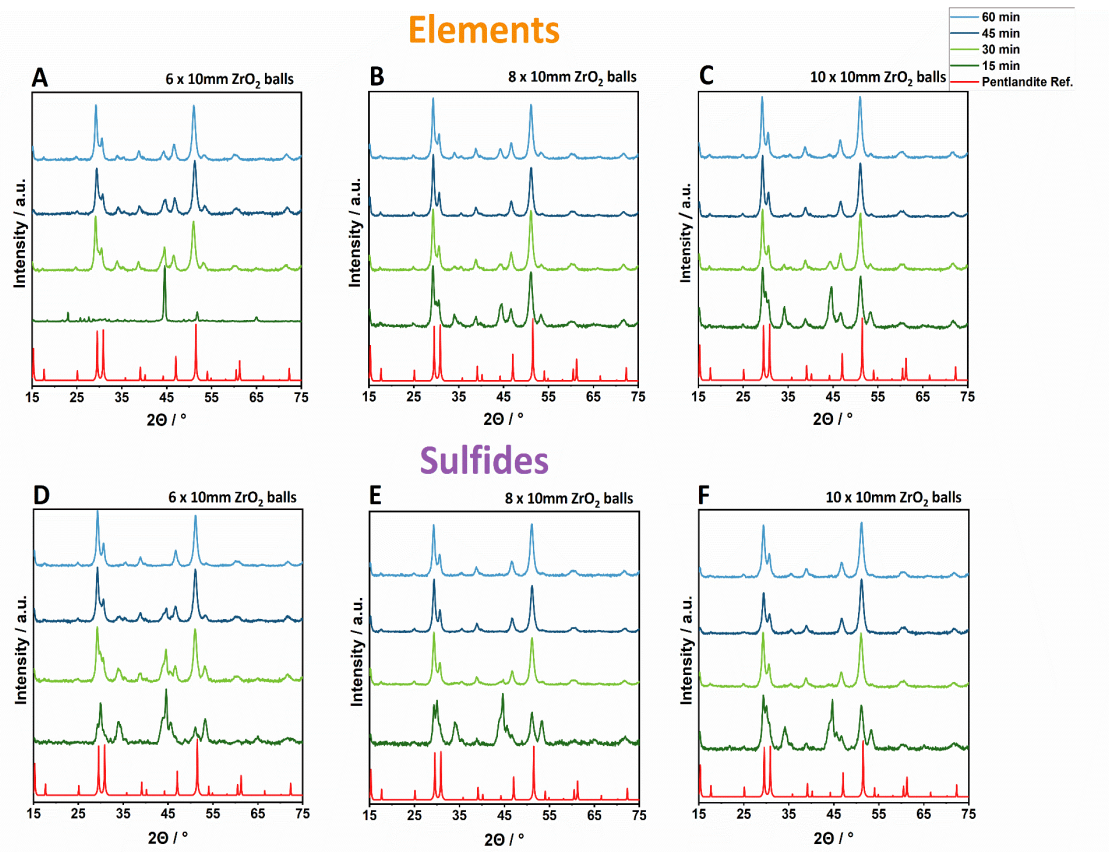

Fig. S1: Powder X-ray diffractogram measurements of Pn synthesized at the different timescales with (A) six, (B) eight and (C) ten 10 mm ZrO<sub>2</sub> balls added to an elemental reaction mixture; (D) six, (E) eight, (F) ten 10 mm ZrO<sub>2</sub> balls added to a sulfidic reaction mixture. <sup>1</sup>

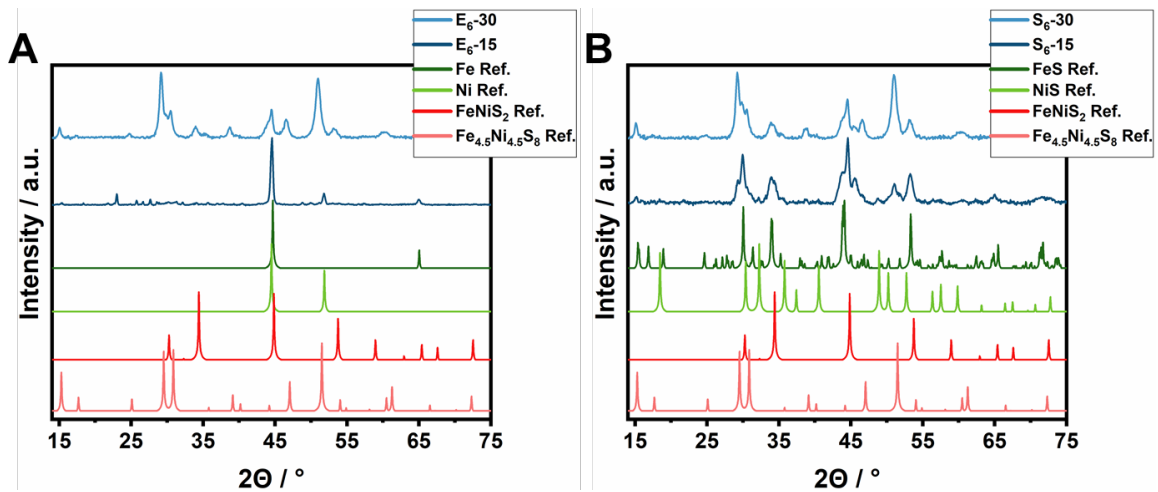

Fig. S2: Phase analysis of the synthesized pentlandite materials using a) an elemental reaction mixtures. b) a sulfidic reaction mixture. Powder diffractograms are compared to the reference powder diffractograms of Fe<sub>4.5</sub>Ni<sub>4.5</sub>S<sub>8</sub><sup>1</sup>, FeNiS<sub>2</sub><sup>2</sup>, Fe<sup>3</sup>, Ni<sup>4</sup>, NIS (Millerite)<sup>5</sup> and FeS (Pyrrhotite)<sup>6</sup>.



## Rietveld analysis of the synthesized Pn materials

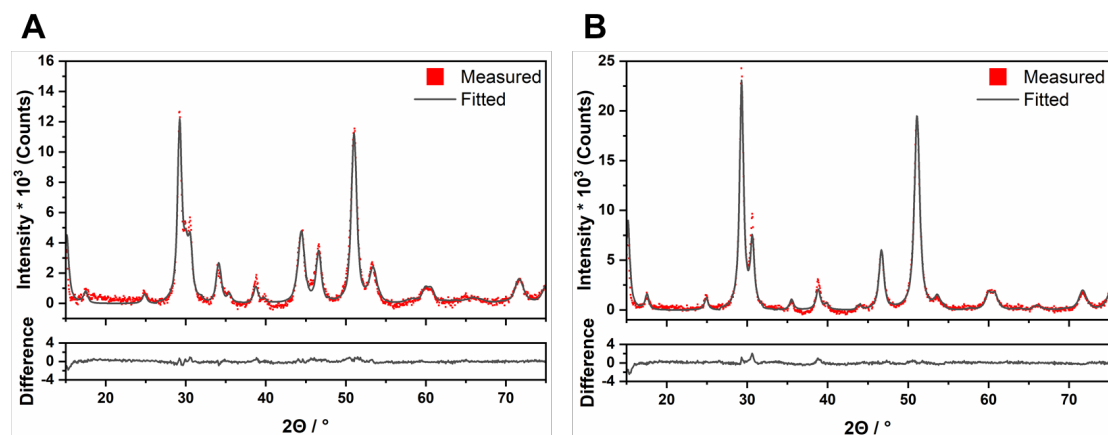

Fig. S3: Examples of Rietveld analysis data performed at the samples A) E<sub>8</sub>-15 and B) E<sub>8</sub>-45.

Table S1: Pentlandite yields of the synthesized materials using an elemental reaction mixture (E<sub>x</sub>-Y) determined via Rietveld analysis. The remaining phases can be ascribed to sulfidic impurities like FeNiS<sub>2</sub>.

| Sample              | Pentlandite yield [%] |
|---------------------|-----------------------|
| E <sub>6</sub> -15  | -                     |
| E <sub>6</sub> -30  | 62,1                  |
| E <sub>6</sub> -45  | 74,8                  |
| E <sub>6</sub> -60  | 87,5                  |
| E <sub>8</sub> -15  | 67,0                  |
| E <sub>8</sub> -30  | 86,1                  |
| E <sub>8</sub> -45  | 99,8                  |
| E <sub>8</sub> -60  | 86,5                  |
| E <sub>10</sub> -15 | 56,0                  |
| E <sub>10</sub> -30 | 85,7                  |
| E <sub>10</sub> -45 | 99,6                  |
| E <sub>10</sub> -60 | 99,3                  |

Table S2: Pentlandite yields of the synthesized materials using a sulfidic reaction mixture (S<sub>x</sub>-Y) determined via Rietveld analysis. The remaining phases can be ascribed to sulfidic impurities like FeNiS<sub>2</sub>.

| Sample              | Pentlandite yield [%] |
|---------------------|-----------------------|
| S <sub>6</sub> -15  | 18,3                  |
| S <sub>6</sub> -30  | 50,7                  |
| S <sub>6</sub> -45  | 72,2                  |
| S <sub>6</sub> -60  | 99,3                  |
| S <sub>8</sub> -15  | 33,1                  |
| S <sub>8</sub> -30  | 90,7                  |
| S <sub>8</sub> -45  | 100                   |
| S <sub>8</sub> -60  | 99,3                  |
| S <sub>10</sub> -15 | 34,4                  |
| S <sub>10</sub> -30 | 99,7                  |
| S <sub>10</sub> -45 | 99,5                  |
| S <sub>10</sub> -60 | 99,7                  |

## Differential Scanning Calorimetry of the synthesized Pn materials

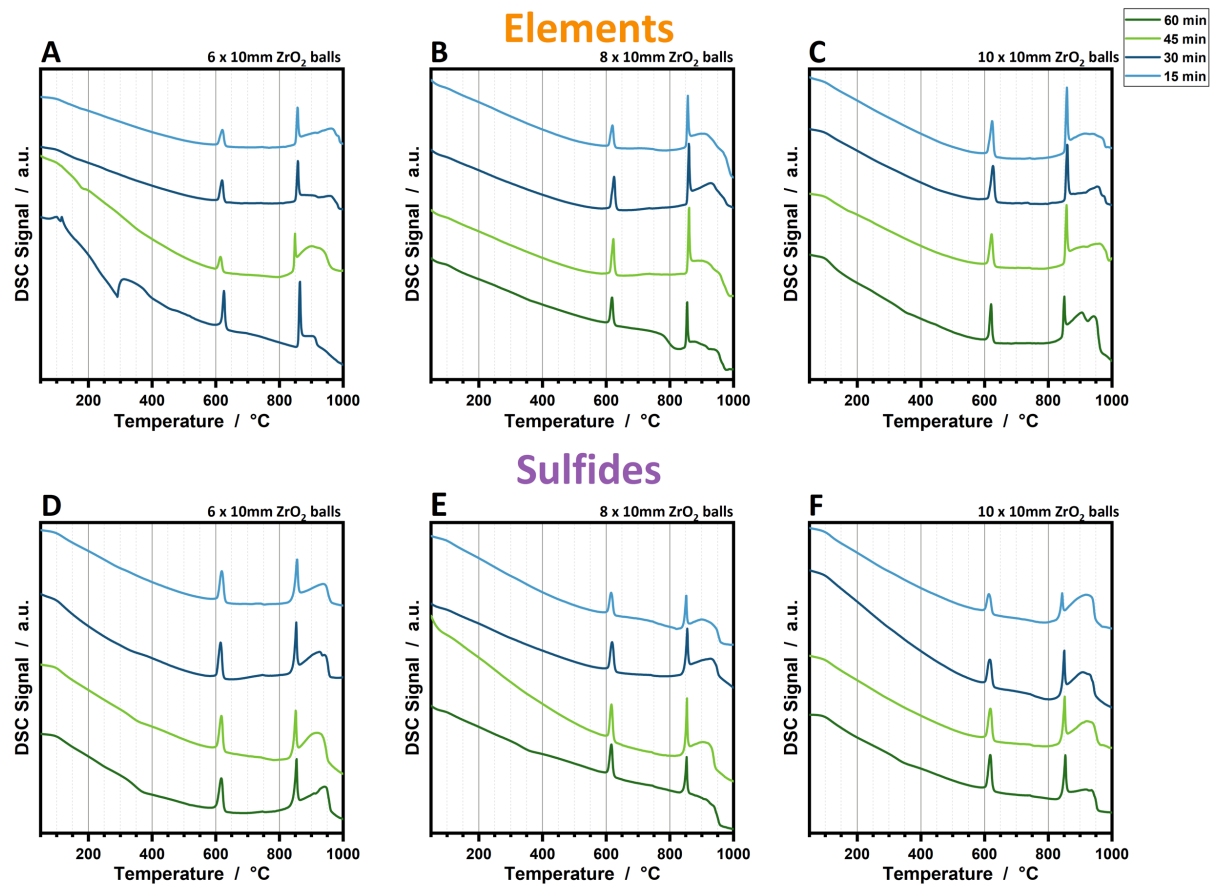

**Fig. S4:** Differential scanning calorimetry measurements of Pn synthesized across the different timescales with a) six 10 mm ZrO<sub>2</sub> balls added to an elemental reaction mixture. (b) eight 10 mm ZrO<sub>2</sub> balls added to an elemental reaction mixture. (c) ten 10 mm ZrO<sub>2</sub> balls added to an elemental reaction mixture. (d) six 10 mm ZrO<sub>2</sub> balls added to a sulfidic reaction mixture. (e) eight 10 mm ZrO<sub>2</sub> balls added to a sulfidic reaction mixture. (f) ten 10 mm ZrO<sub>2</sub> balls added to a sulfidic reaction mixture.

Phase transitions of the synthesized Pn materials from the elemental reactants according to Differential Scanning Calorimetry

**Table S3:** Phase transition onset temperatures of the synthesized E<sub>x</sub>-Y Pn materials.

| <b>Sample</b>            | <b>T<sub>1</sub> low→high (°C)</b> | <b>T<sub>2</sub> breakdown (°C)</b> |
|--------------------------|------------------------------------|-------------------------------------|
| <b>E<sub>6</sub>-15</b>  | 617                                | 858                                 |
| <b>E<sub>6</sub>-30</b>  | 603                                | 845                                 |
| <b>E<sub>6</sub>-45</b>  | 607                                | 851                                 |
| <b>E<sub>6</sub>-60</b>  | 606                                | 851                                 |
| <b>E<sub>8</sub>-15</b>  | 609                                | 850                                 |
| <b>E<sub>8</sub>-30</b>  | 612                                | 855                                 |
| <b>E<sub>8</sub>-45</b>  | 613                                | 854                                 |
| <b>E<sub>8</sub>-60</b>  | 608                                | 852                                 |
| <b>E<sub>10</sub>-15</b> | 612                                | 845                                 |
| <b>E<sub>10</sub>-30</b> | 610                                | 851                                 |
| <b>E<sub>10</sub>-45</b> | 614                                | 853                                 |
| <b>E<sub>10</sub>-60</b> | 611                                | 852                                 |
| <b>Ref.<sup>7</sup></b>  | 617                                | 859                                 |

## Phase transitions of the synthesized Pn materials from the sulfidic reactants according to Differential Scanning Calorimetry

**Table S4:** Phase transition onset temperatures of the synthesized S<sub>x</sub>-Y Pn materials.

| <b>Sample</b>            | <b>T<sub>1</sub> low→high (°C)</b> | <b>T<sub>2</sub> breakdown (°C)</b> |
|--------------------------|------------------------------------|-------------------------------------|
| <b>S<sub>6</sub>-15</b>  | 603                                | 846                                 |
| <b>S<sub>6</sub>-30</b>  | 605                                | 843                                 |
| <b>S<sub>6</sub>-45</b>  | 603                                | 845                                 |
| <b>S<sub>6</sub>-60</b>  | 606                                | 845                                 |
| <b>S<sub>8</sub>-15</b>  | 606                                | 846                                 |
| <b>S<sub>8</sub>-30</b>  | 607                                | 848                                 |
| <b>S<sub>8</sub>-45</b>  | 608                                | 847                                 |
| <b>S<sub>8</sub>-60</b>  | 605                                | 844                                 |
| <b>S<sub>10</sub>-15</b> | 606                                | 845                                 |
| <b>S<sub>10</sub>-30</b> | 606                                | 844                                 |
| <b>S<sub>10</sub>-45</b> | 603                                | 842                                 |
| <b>S<sub>10</sub>-60</b> | 602                                | 837                                 |
| <b>Ref.<sup>7</sup></b>  | 617                                | 859                                 |

Differential Scanning Calorimetry analysis of an unreacted elemental reaction mixture

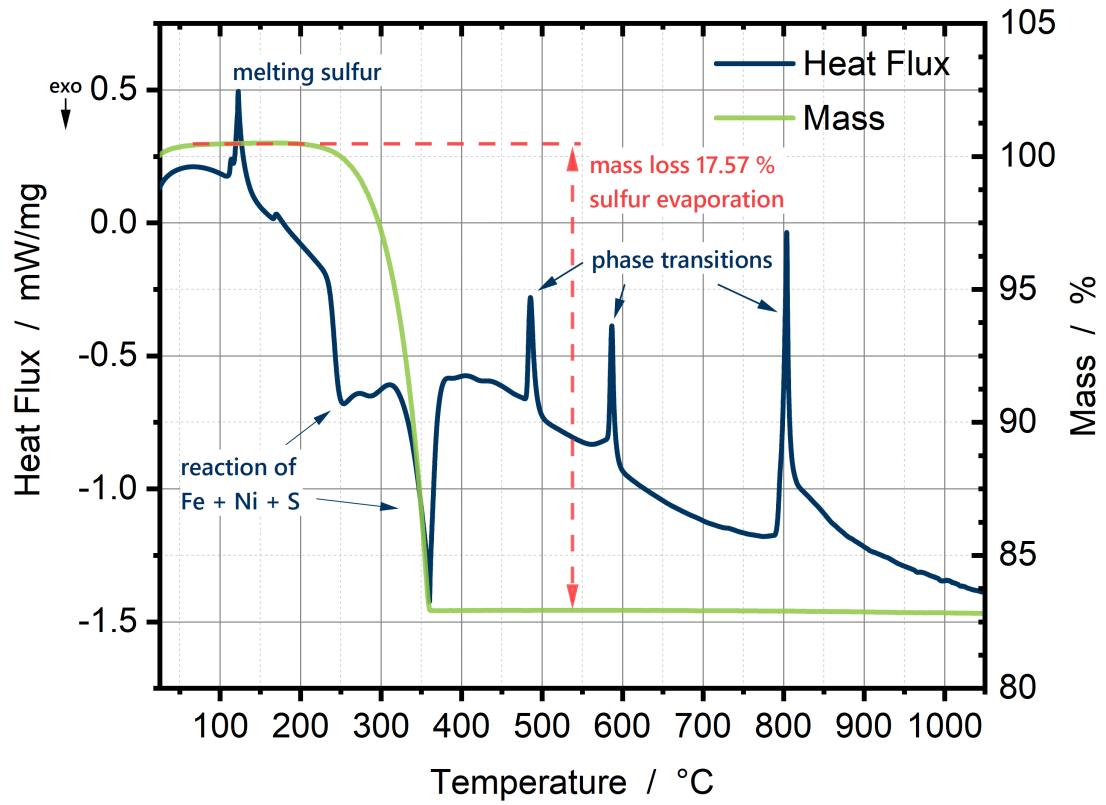

Fig. S5: DSC measurement of the unreacted elemental reaction mixture.

Scanning Electron Microscopy of the synthesized Pn materials from an elemental reaction mixture

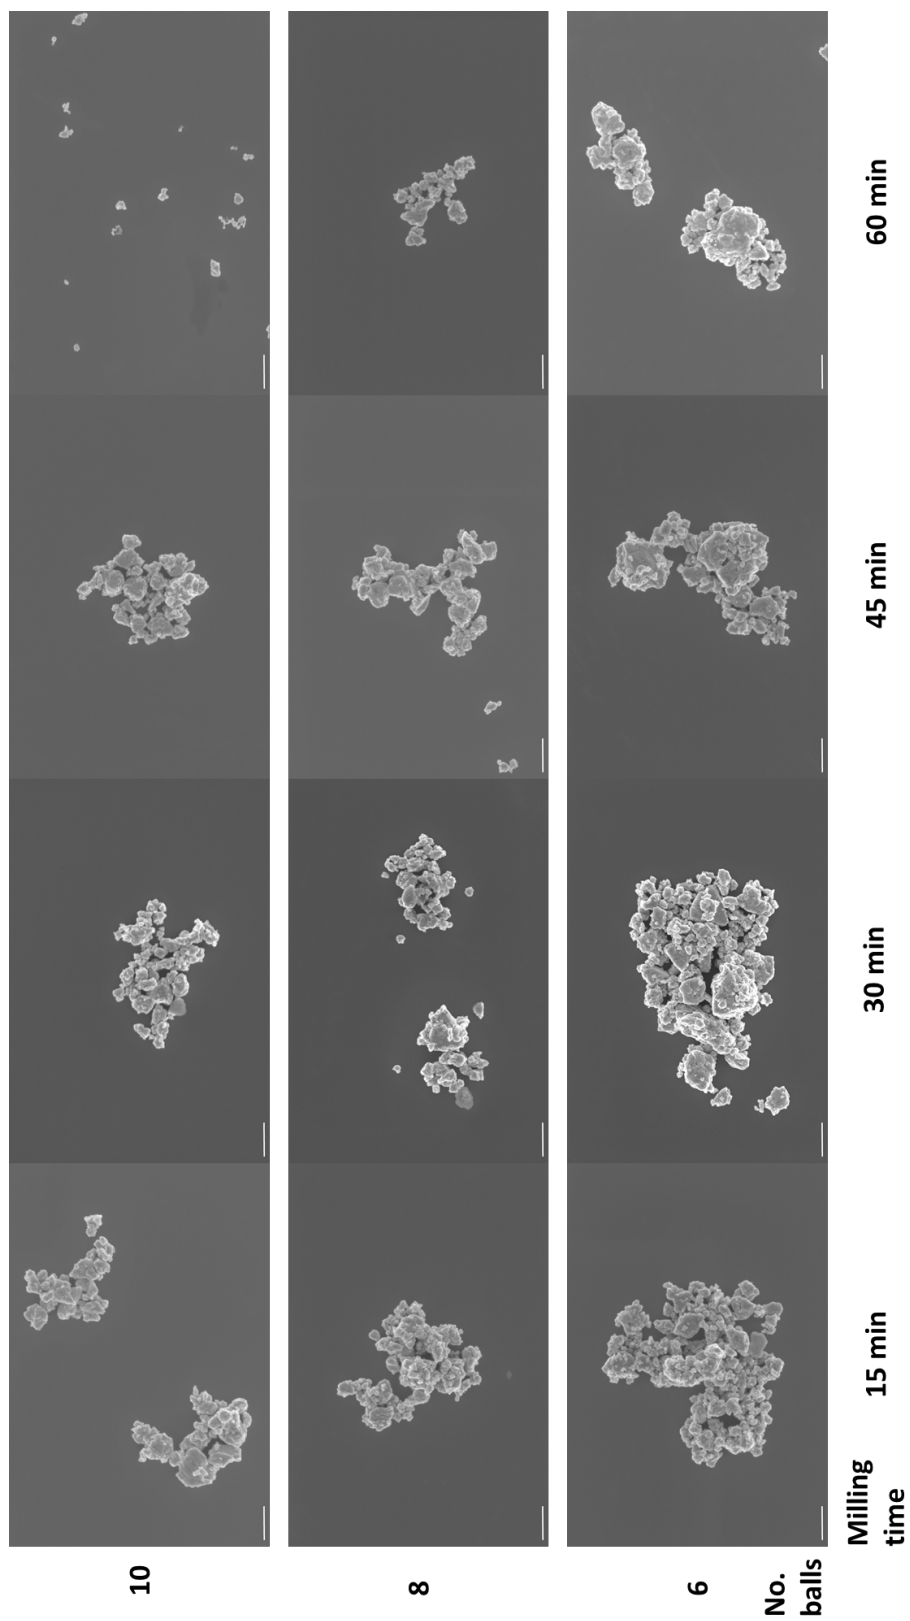

Fig. S6: SEM images of the synthesized Pn materials synthesized from the elemental reaction mixture. The scale bar is 1 μm.

Scanning Electron Microscopy of the synthesized Pn materials from a sulfidic reaction mixture

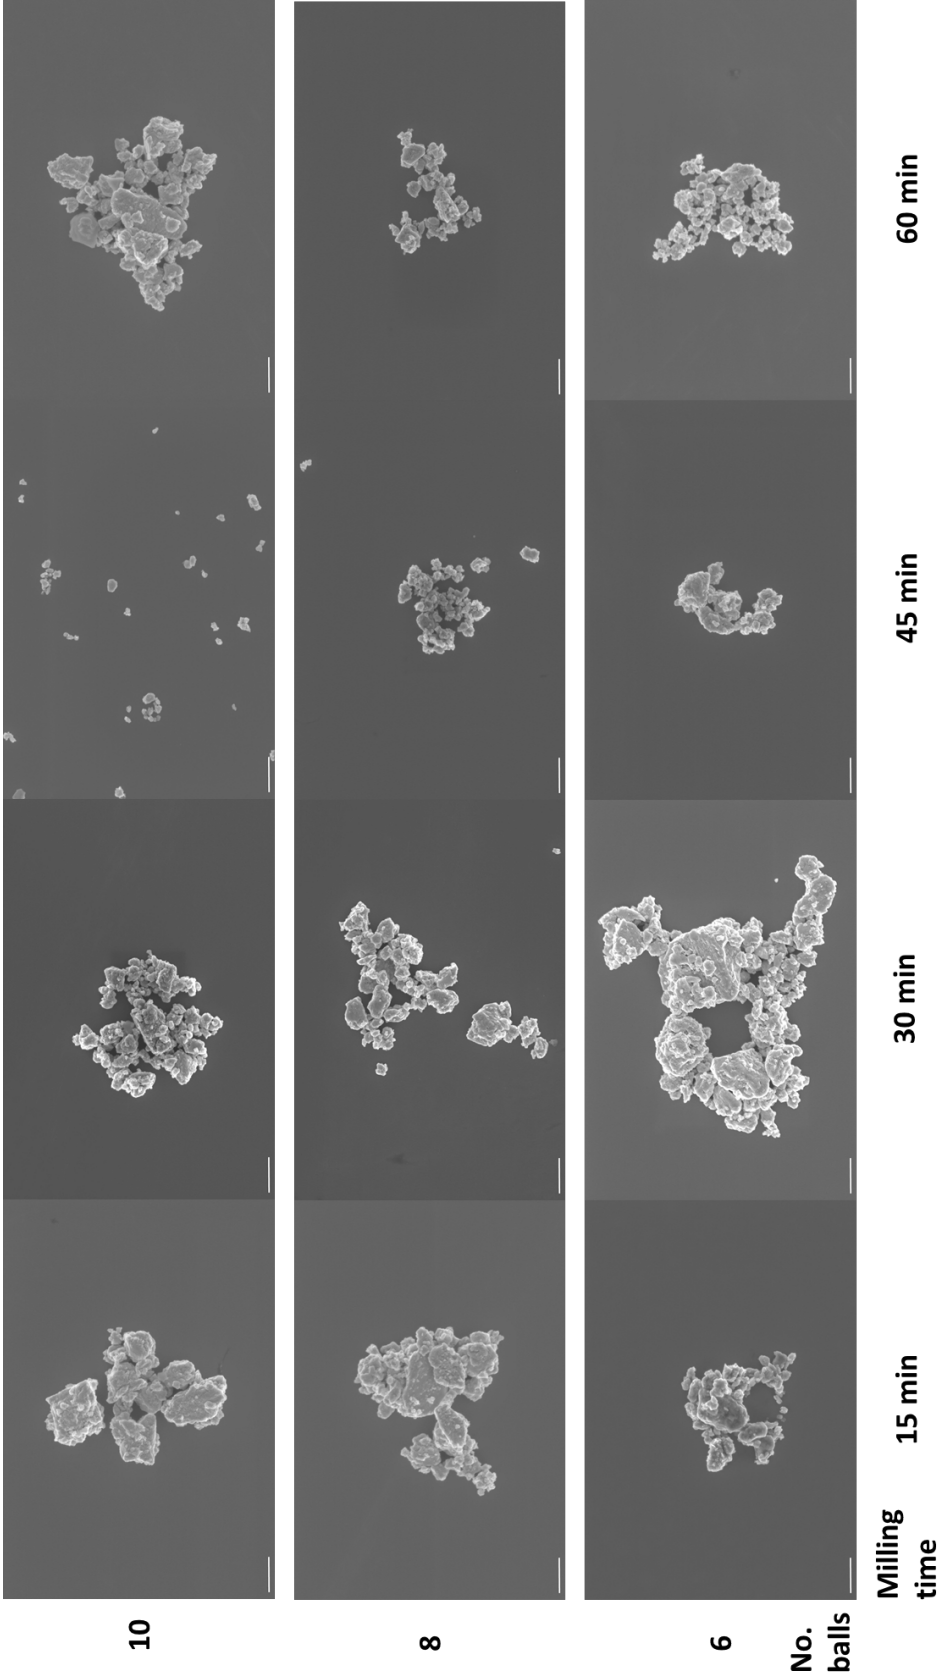

Fig. S7: SEM images of the synthesized Pn materials synthesized from the sulfidic reaction mixture. The scale bar is 1 μm.

## Disc centrifuge measurements of the synthesized materials

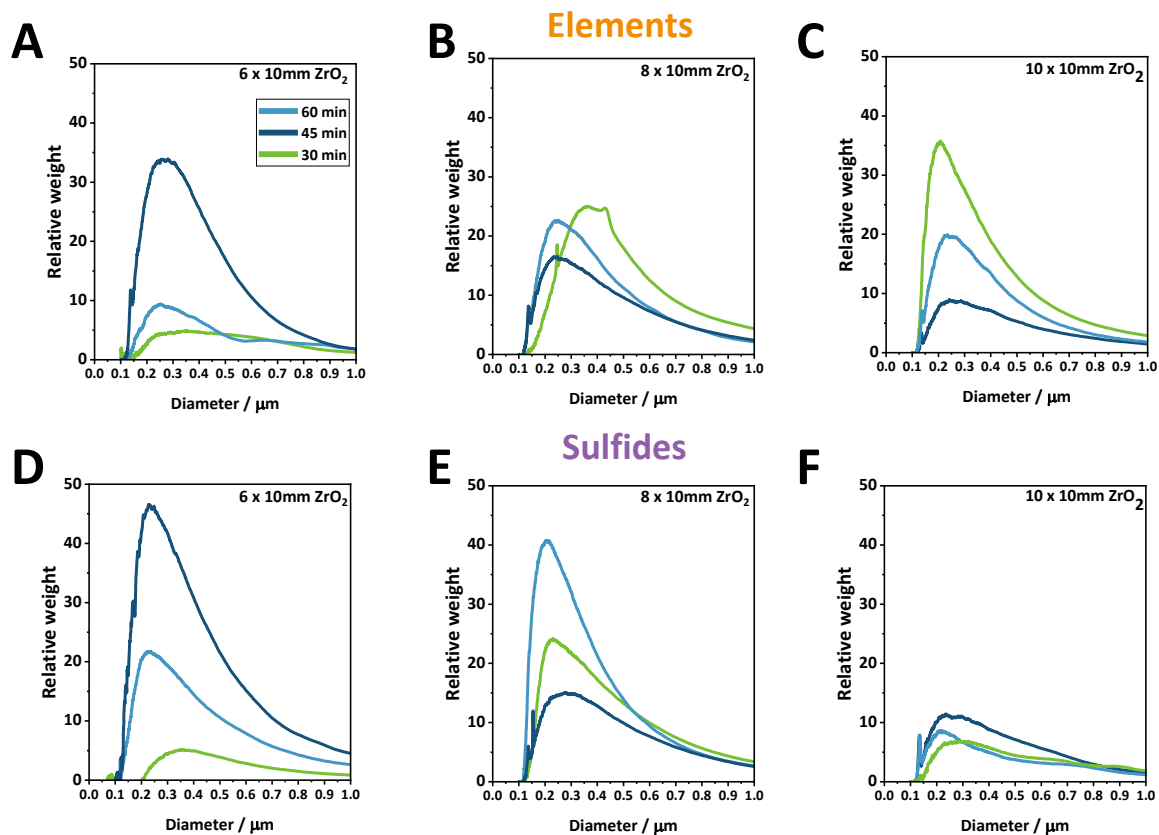

Fig. S8: Disc centrifuge measurements of Pn synthesized across different timescales employing (A) six 10 mm ZrO<sub>2</sub> balls added to an elemental mixture. (B) eight 10 mm ZrO<sub>2</sub> balls added to an elemental mixture. (C) ten 10 mm ZrO<sub>2</sub> balls added to an elemental mixture. (D) six 10 mm ZrO<sub>2</sub> balls added to a sulfide mixture. (E) eight 10 mm ZrO<sub>2</sub> balls added to a sulfide mixture. (F) ten 10 mm ZrO<sub>2</sub> balls added to a sulfide mixture. Since samples prepared by 15 min of milling do not show a pure pentlandite phase, discussion of their particle distribution is omitted.



## Particle size analysis of the synthesized Pn materials prepared through an elemental reaction mixture

**Table S5:** Mean particles sizes of the synthesized pentlandite materials from the elemental reaction mixture determined via disc centrifuge.

| <b>Sample</b>            | <b>Particle size (nm)</b> |
|--------------------------|---------------------------|
| <b>E<sub>6</sub>-30</b>  | 358 ± 30                  |
| <b>E<sub>6</sub>-45</b>  | 232 ± 20                  |
| <b>E<sub>6</sub>-60</b>  | 229 ± 20                  |
| <b>E<sub>8</sub>-30</b>  | 363 ± 25                  |
| <b>E<sub>8</sub>-45</b>  | 244 ± 30                  |
| <b>E<sub>8</sub>-60</b>  | 240 ± 30                  |
| <b>E<sub>10</sub>-30</b> | 208 ± 15                  |
| <b>E<sub>10</sub>-45</b> | 243 ± 30                  |
| <b>E<sub>10</sub>-60</b> | 235 ± 30                  |

## Particle size analysis of the synthesized Pn materials prepared through a sulfidic reaction mixture

**Table S6:** Mean particles sizes of the synthesized pentlandite materials from the sulfidic reaction mixture determined via disc centrifuge.

| <b>Sample</b>            | <b>Particle size (nm)</b> |
|--------------------------|---------------------------|
| <b>S<sub>6</sub>-30</b>  | 350 ± 60                  |
| <b>S<sub>6</sub>-45</b>  | 270 ± 25                  |
| <b>S<sub>6</sub>-60</b>  | 253 ± 25                  |
| <b>S<sub>8</sub>-30</b>  | 229 ± 20                  |
| <b>S<sub>8</sub>-45</b>  | 251 ± 25                  |
| <b>S<sub>8</sub>-60</b>  | 209 ± 15                  |
| <b>S<sub>10</sub>-30</b> | 294 ± 50                  |
| <b>S<sub>10</sub>-45</b> | 237 ± 40                  |
| <b>S<sub>10</sub>-60</b> | 218 ± 20                  |

## Non-noble metal HER electrocatalysts in a PEM electrolyzer reports in literature

Table S7: Comparison of the performance of non-noble metal HER electrocatalysts in a PEM electrolyzer reports in literature.

| Catalyst                              | Loading / mg cm <sup>-2</sup> | j / A cm <sup>-2</sup> | Cell potential / V | Membrane   | Anodic catalyst (Loading / mg cm <sup>-2</sup> ) | Temperature / °C | Citation      |
|---------------------------------------|-------------------------------|------------------------|--------------------|------------|--------------------------------------------------|------------------|---------------|
| E <sub>8</sub> -45                    | 1.0                           | 1.0                    | 1.95               | Nafion HP  | Ir-black (2.0)                                   | 80               | This work     |
| E <sub>8</sub> -45                    | 2.0                           | 1.0                    | 1.91               | Nafion HP  | Ir-black (2.5)                                   | 80               | This work     |
| E <sub>8</sub> -45                    | 4.0                           | 1.0                    | 1.93               | Nafion HP  | Ir-black (2.5)                                   | 80               | This work     |
| 47 wt.% MoS <sub>2</sub> /Vulcan      | 5.0                           | 0.3                    | 2.00               | Nafion 117 | IrO <sub>2</sub> (2.0)                           | 80               | <sup>8</sup>  |
| Pyrite/C                              | 4.0                           | 1.0                    | 2.10               | Nafion 115 | IrO <sub>2</sub> (2.0)                           | 80               | <sup>9</sup>  |
| Greigite/C                            | 4.0                           | 1.0                    | 2.13               | Nafion 115 | IrO <sub>2</sub> (2.0)                           | 80               | <sup>9</sup>  |
| Pyrrhotite/C                          | 4.0                           | 1.0                    | 2.16               | Nafion 115 | IrO <sub>2</sub> (2.0)                           | 80               | <sup>9</sup>  |
| RuS <sub>2</sub> @MoS <sub>2</sub>    | 2.0                           | 1.0                    | 1.65               | Nafion 112 | IrO <sub>2</sub> (2.0)                           | 80               | <sup>10</sup> |
| MoP S                                 | 3.0                           | 1.1                    | 2.00               | Nafion 115 | IrO <sub>2</sub> (2.0)                           | 80               | <sup>11</sup> |
| Mo <sub>3</sub> S <sub>13</sub> -NCNT | 3.0                           | 1.4                    | 2.00               | Nafion 212 | IrO <sub>2</sub> (1.5)                           | 80               | <sup>12</sup> |

## Zr quantification through PIXE

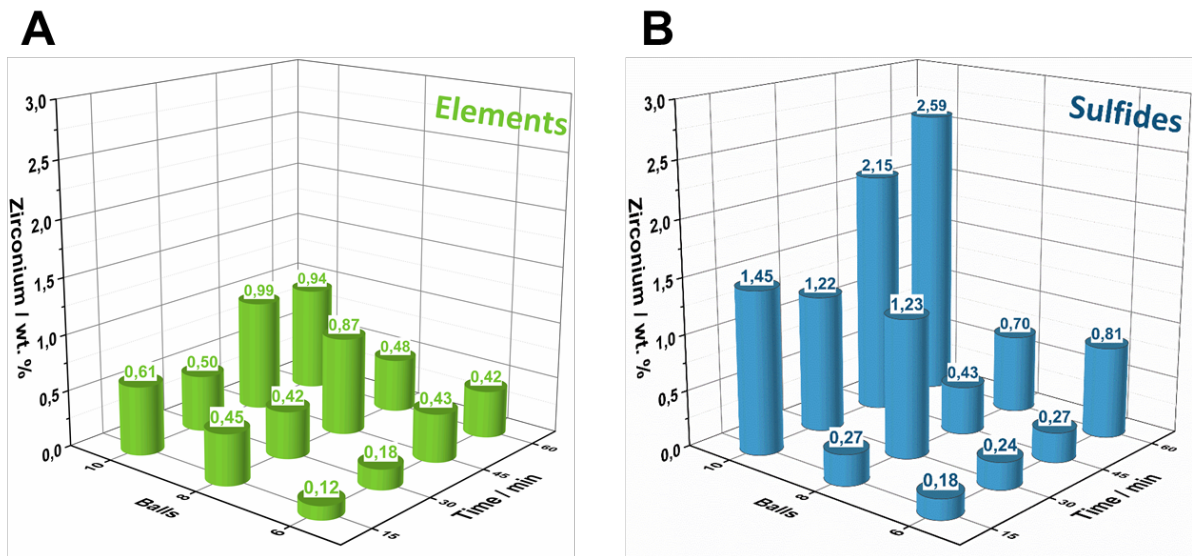

Fig. S9: Quantification of Zr abrasion impurities via PIXE of the synthesized Pn samples synthesized by employing a) elemental reaction mixtures. b) sulfidic reaction mixtures.

EDX mapping analysis of the synthesized Pn materials prepared through an elemental reaction mixture using six ZrO<sub>2</sub> milling balls

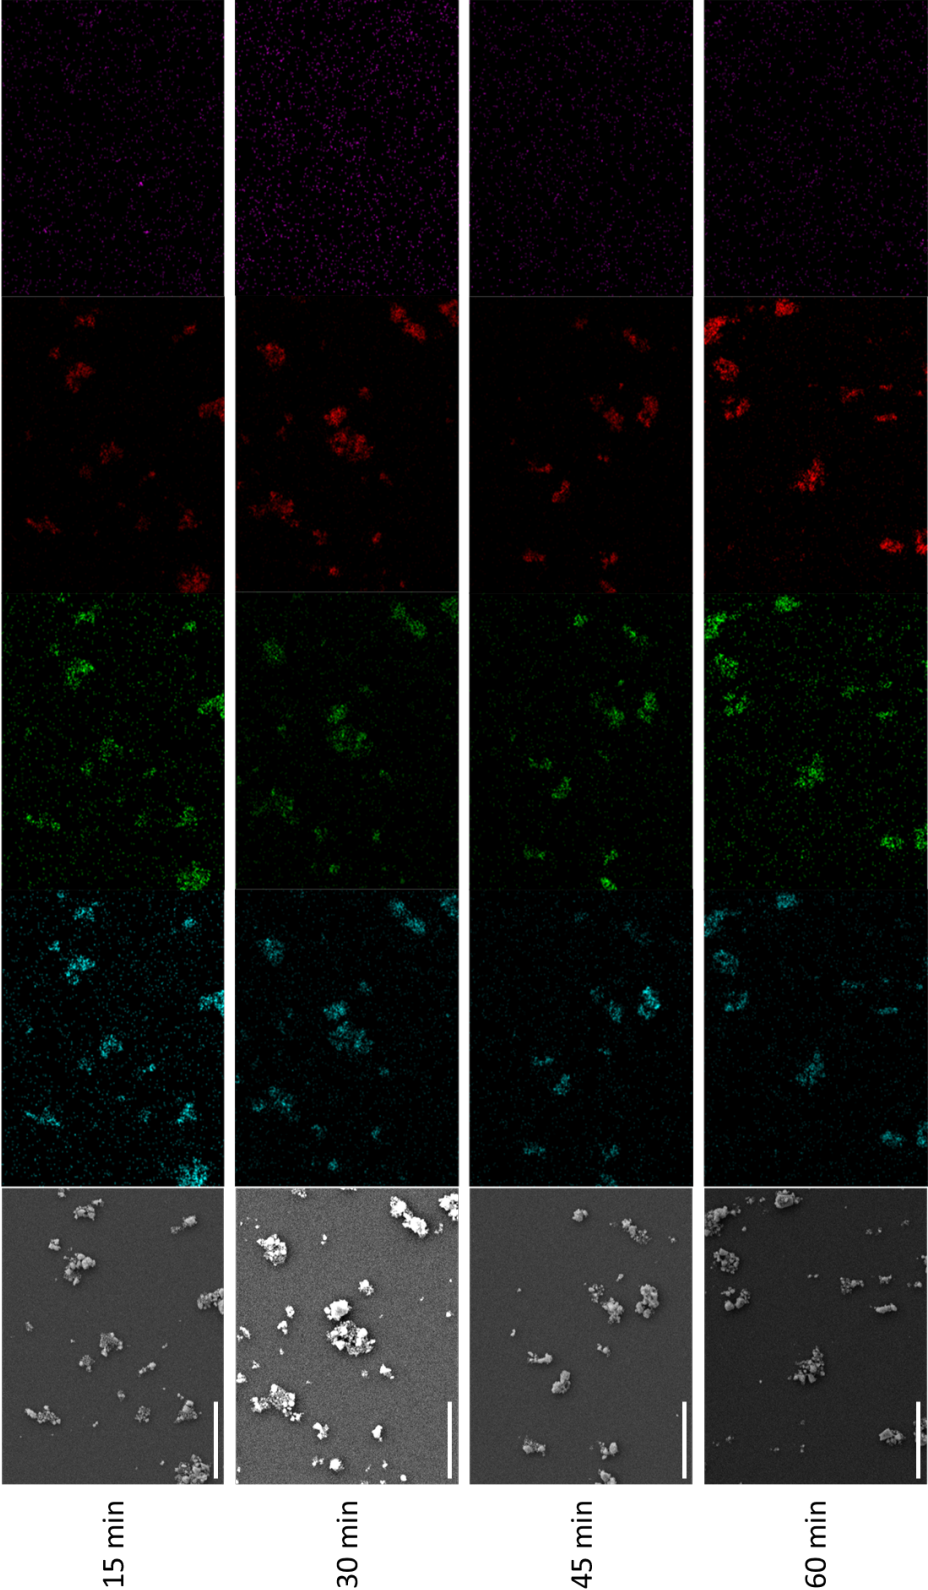

**Fig. S10:** EDX elemental mapping of the synthesized Pn materials synthesized from the elemental reaction mixture using six milling balls. The scale bar is 25  $\mu\text{m}$ . EDX mappings reveal the presence of the elements Fe (blue), Ni (green), sulfur (red) and zirconium (violet).

EDX mapping analysis of the synthesized Pn materials prepared through an elemental reaction mixture using eight ZrO<sub>2</sub> milling balls

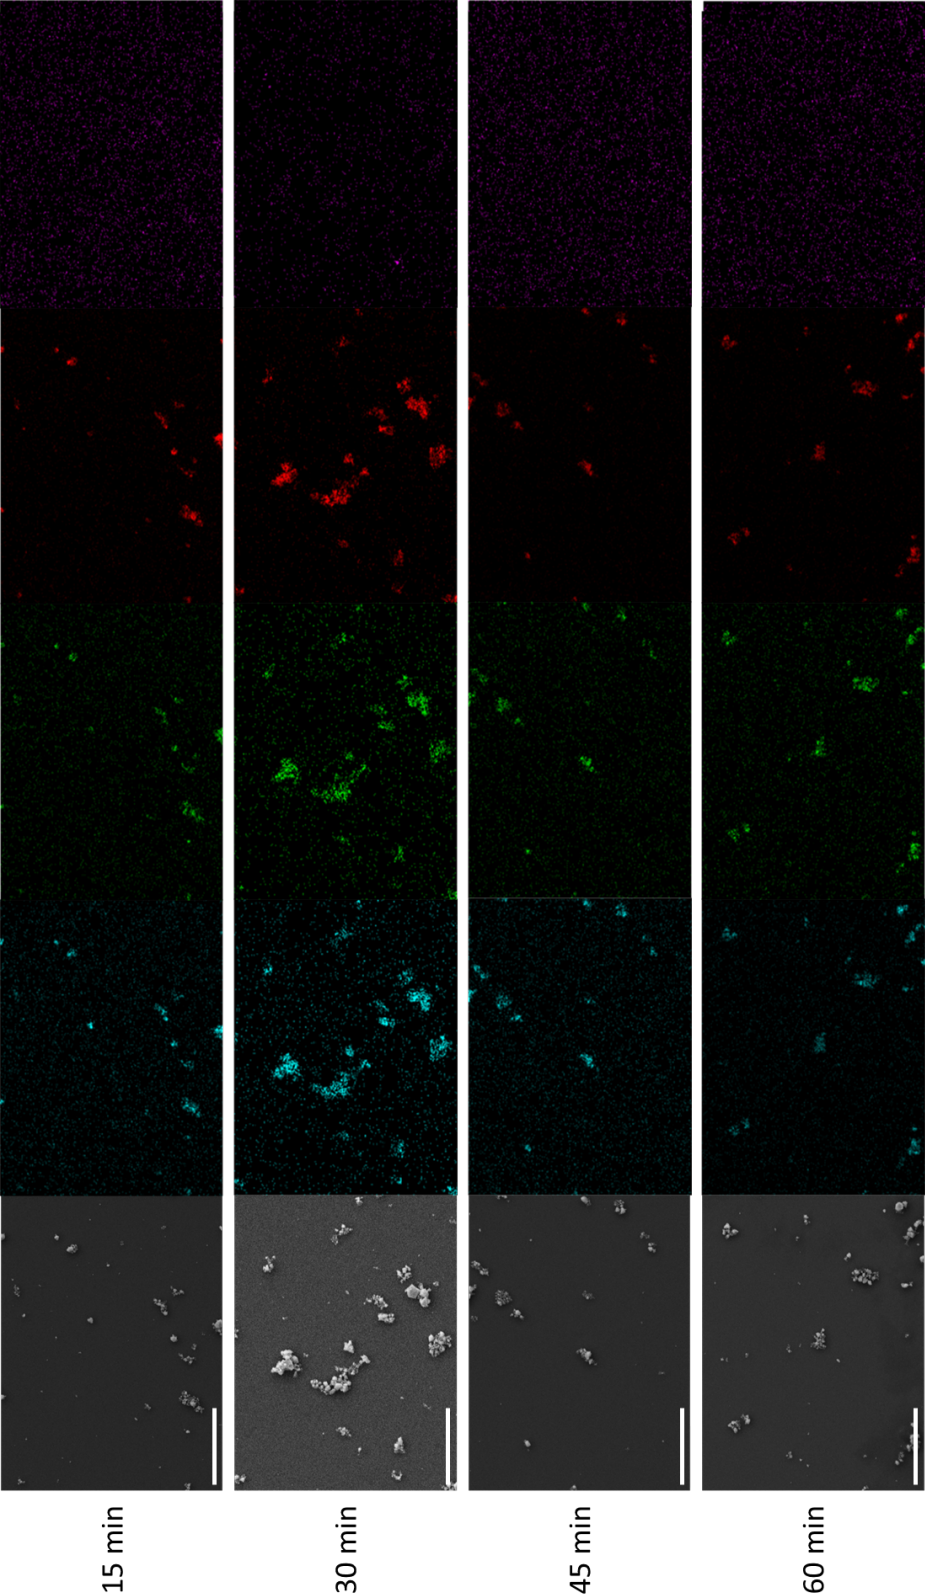

Fig. S11: EDX elemental mapping of the synthesized Pn materials synthesized from the elemental reaction mixture using eight milling balls. The scale bar is 25  $\mu\text{m}$ . EDX mappings reveal the presence of the elements Fe (blue), Ni (green), sulfur (red) and zirconium (violet).



EDX mapping analysis of the synthesized Pn materials prepared through an elemental reaction mixture using ten ZrO<sub>2</sub> milling balls

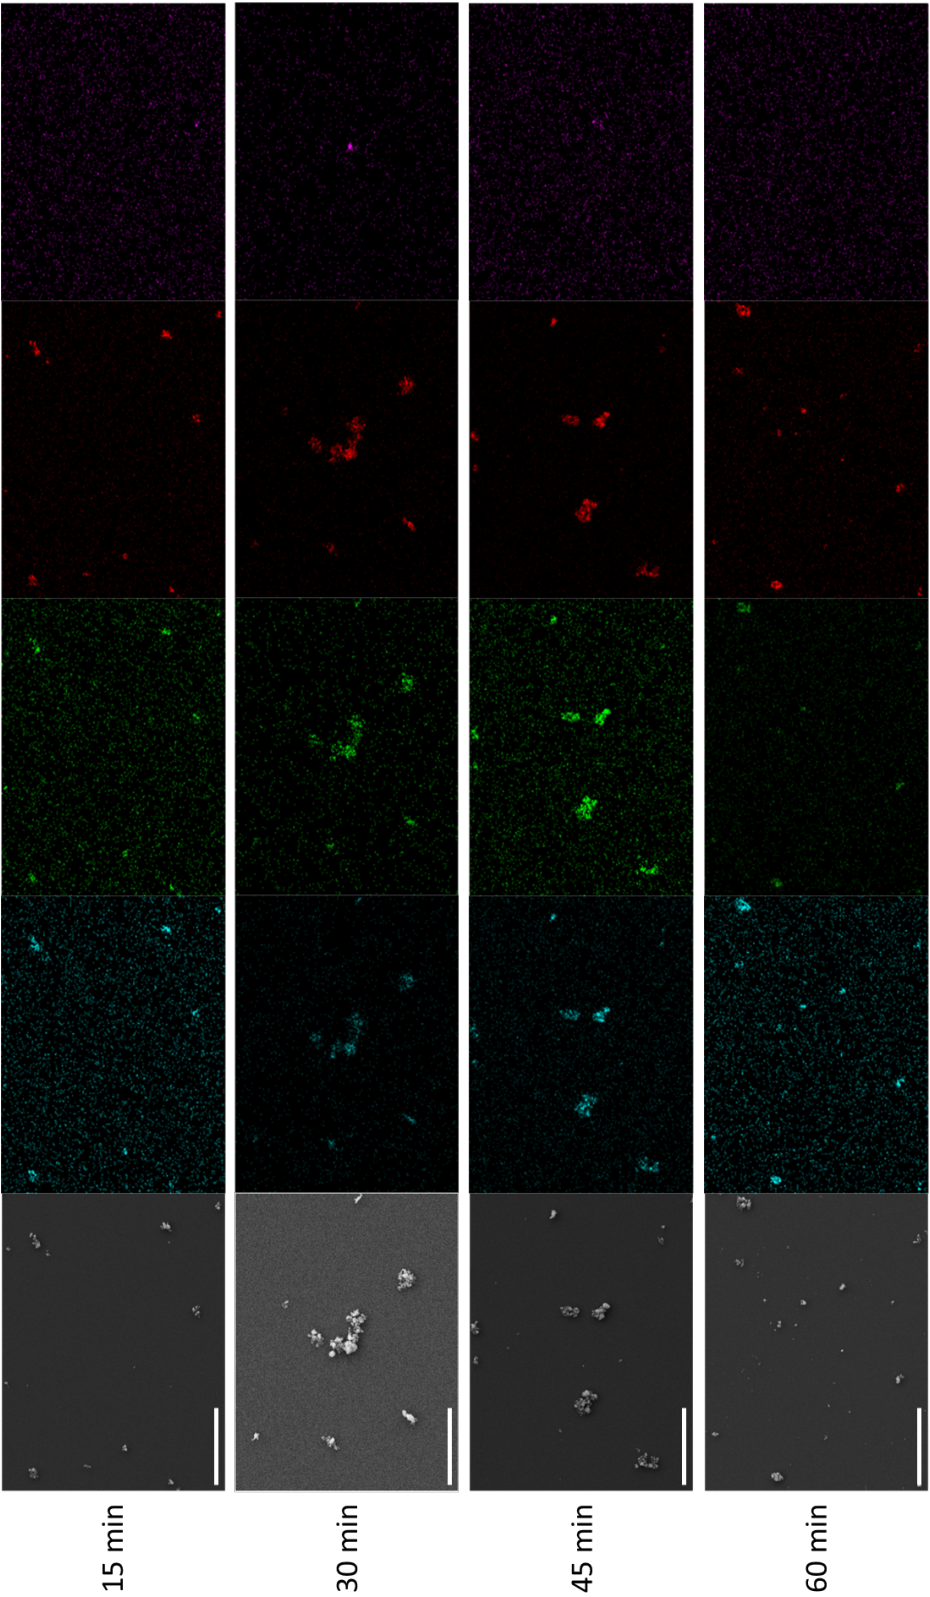

**Fig. S12:** EDX elemental mapping of the synthesized Pn materials synthesized from the elemental reaction mixture using ten milling balls. The scale bar is 25 μm. EDX mappings reveal the presence of the elements Fe (blue), Ni (green), sulfur (red) and zirconium (violet).

EDX mapping analysis of the synthesized Pn materials prepared through a sulfidic reaction mixture using six ZrO<sub>2</sub> milling balls

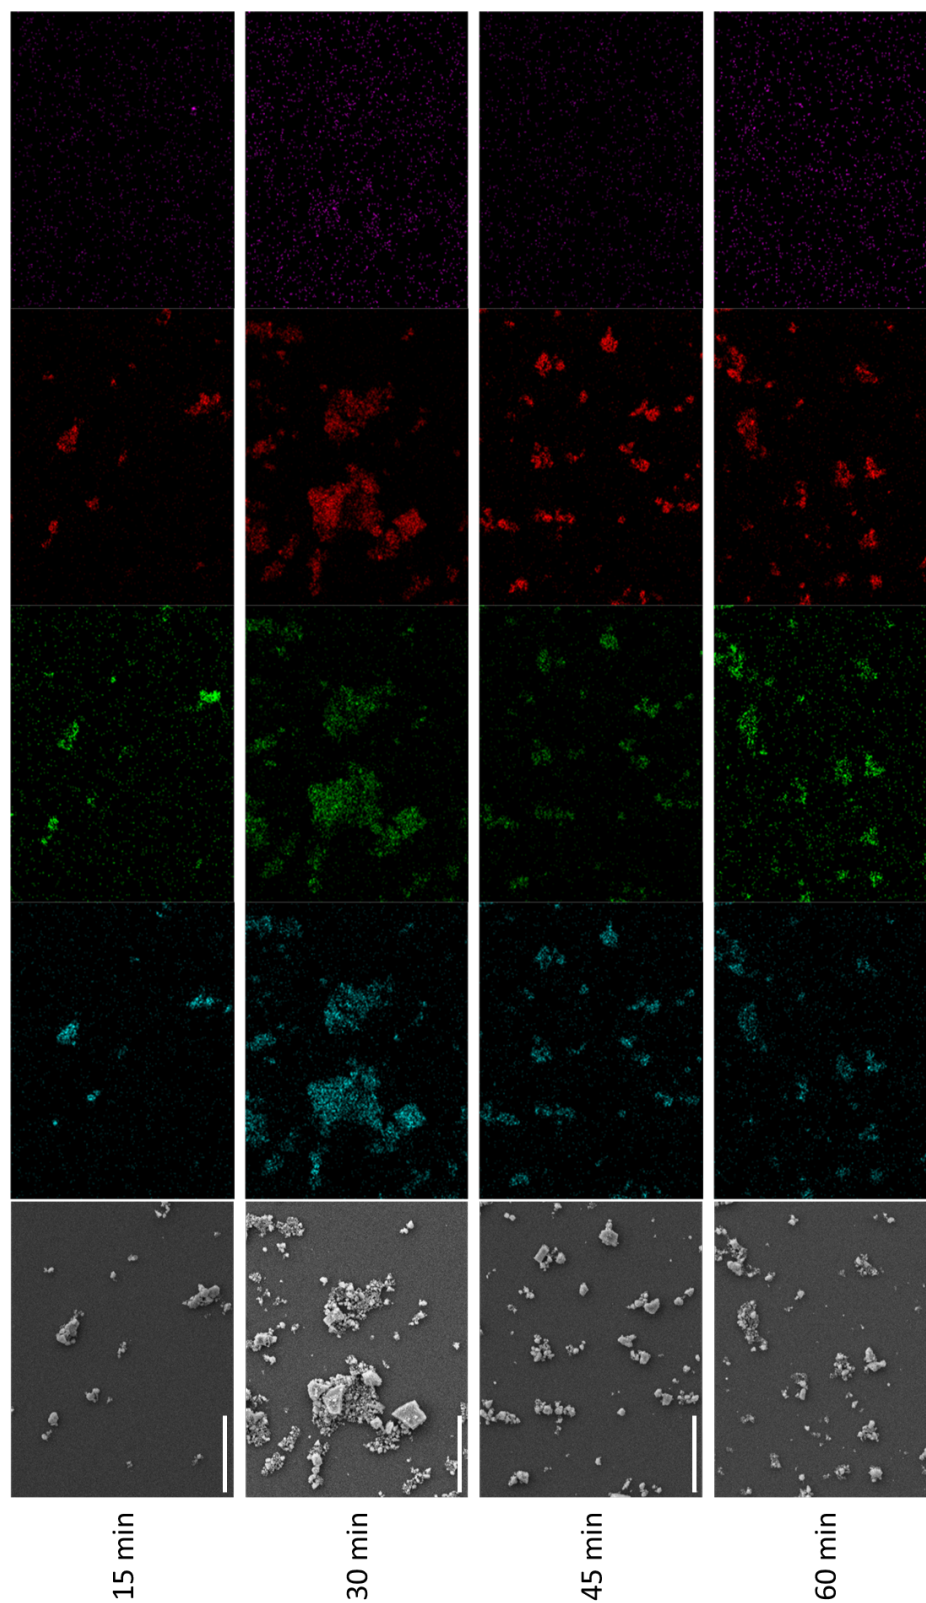

**Fig. S13:** EDX elemental mapping of the synthesized Pn materials synthesized from the sulfidic reaction mixture using six milling balls. The scale bar is 25  $\mu\text{m}$ . EDX mappings reveal the presence of the elements Fe (blue), Ni (green), sulfur (red) and zirconium (violet).



EDX mapping analysis of the synthesized Pn materials prepared through a sulfidic reaction mixture using eight ZrO<sub>2</sub> milling balls

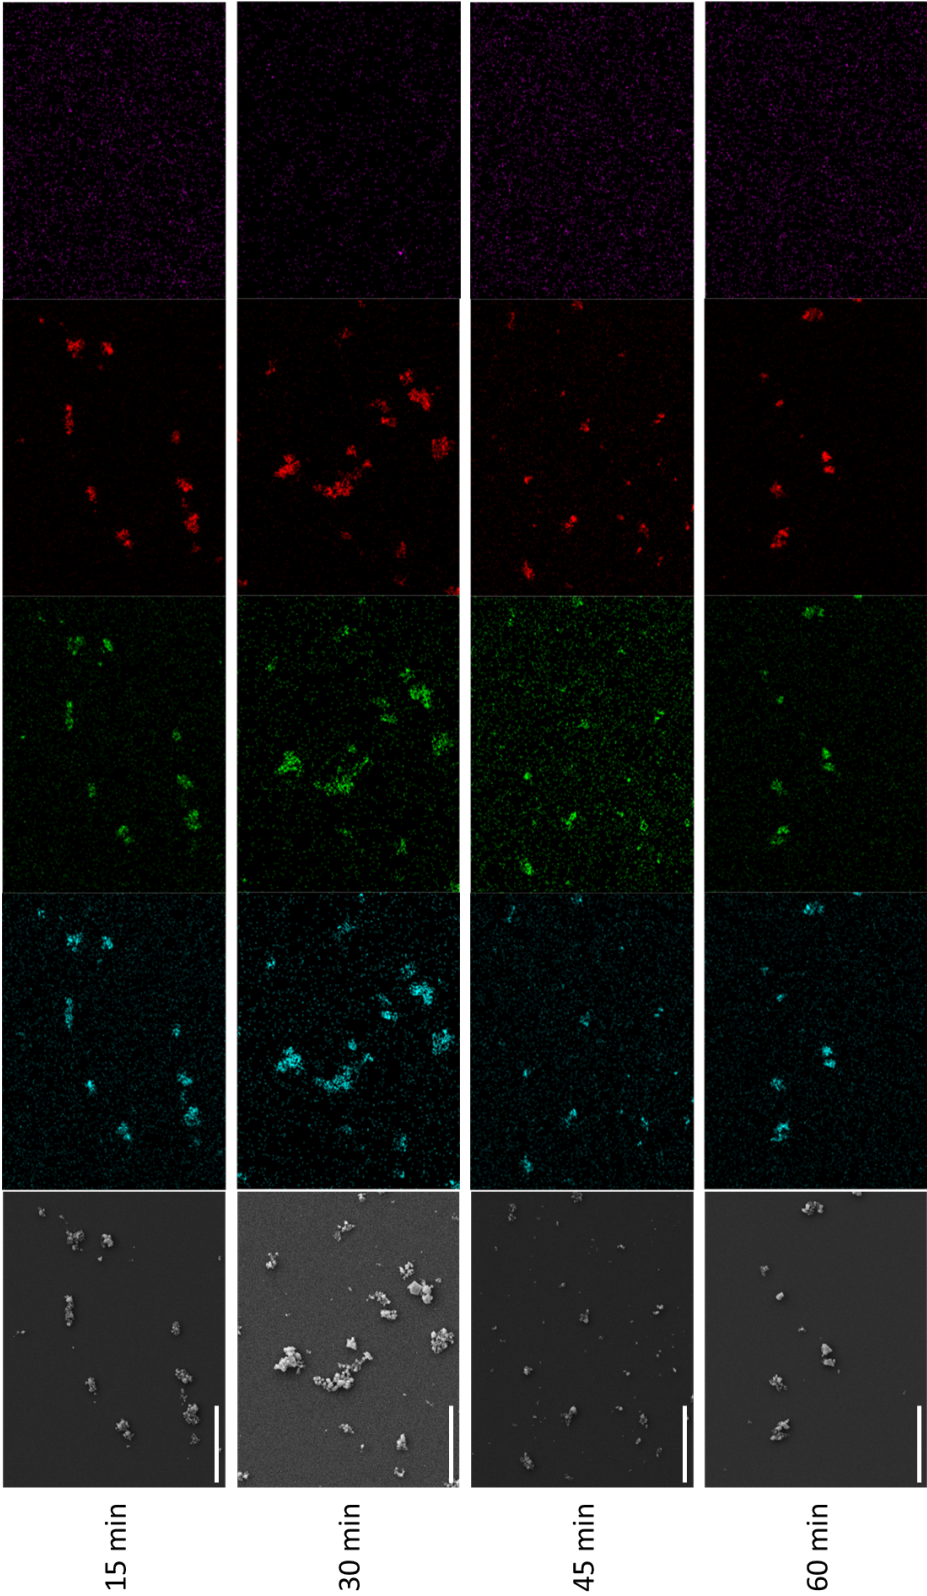

**Fig. S14:** EDX elemental mapping of the synthesized Pn materials synthesized from the sulfidic reaction mixture using eight milling balls. The scale bar is 25 µm. EDX mappings reveal the presence of the elements Fe (blue), Ni (green), sulfur (red) and zirconium (violet).

EDX mapping of the synthesized Pn materials prepared through a sulfidic reaction mixture using ten ZrO<sub>2</sub> milling balls

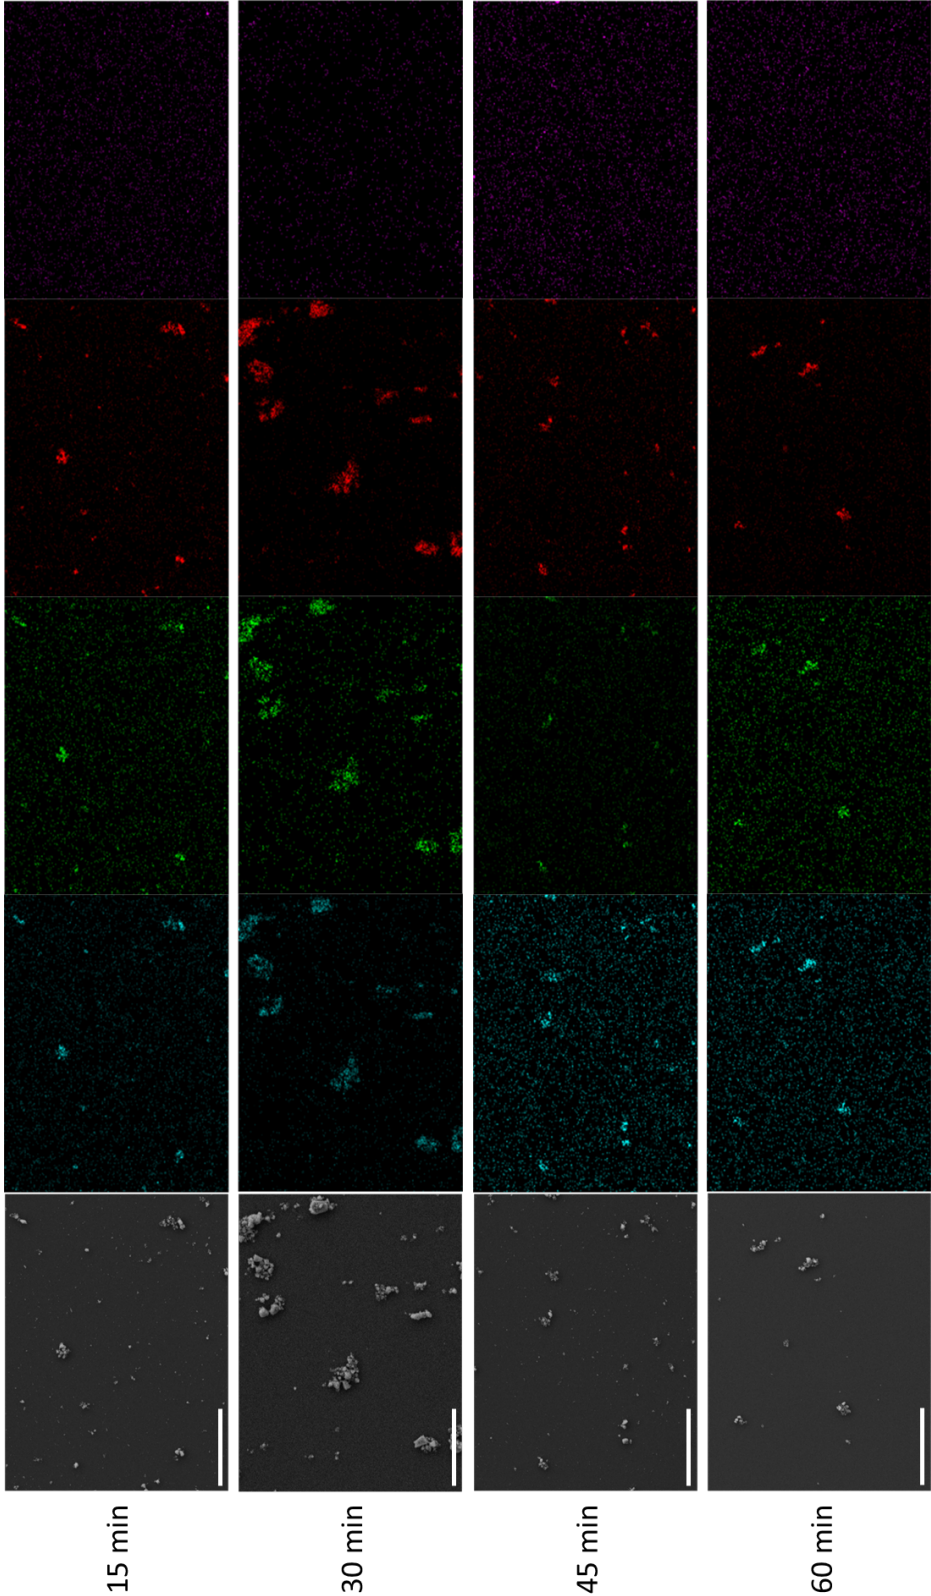

**Fig. S15:** EDX elemental mapping of the synthesized Pn materials synthesized from the sulfidic reaction mixture using ten milling balls. The scale bar is 25  $\mu\text{m}$ . EDX mappings reveal the presence of the elements Fe (blue), Ni (green), sulfur (red) and zirconium (violet).

## Gas and Temperature monitoring in the milling vessel starting from elemental and sulfidic reactant mixtures

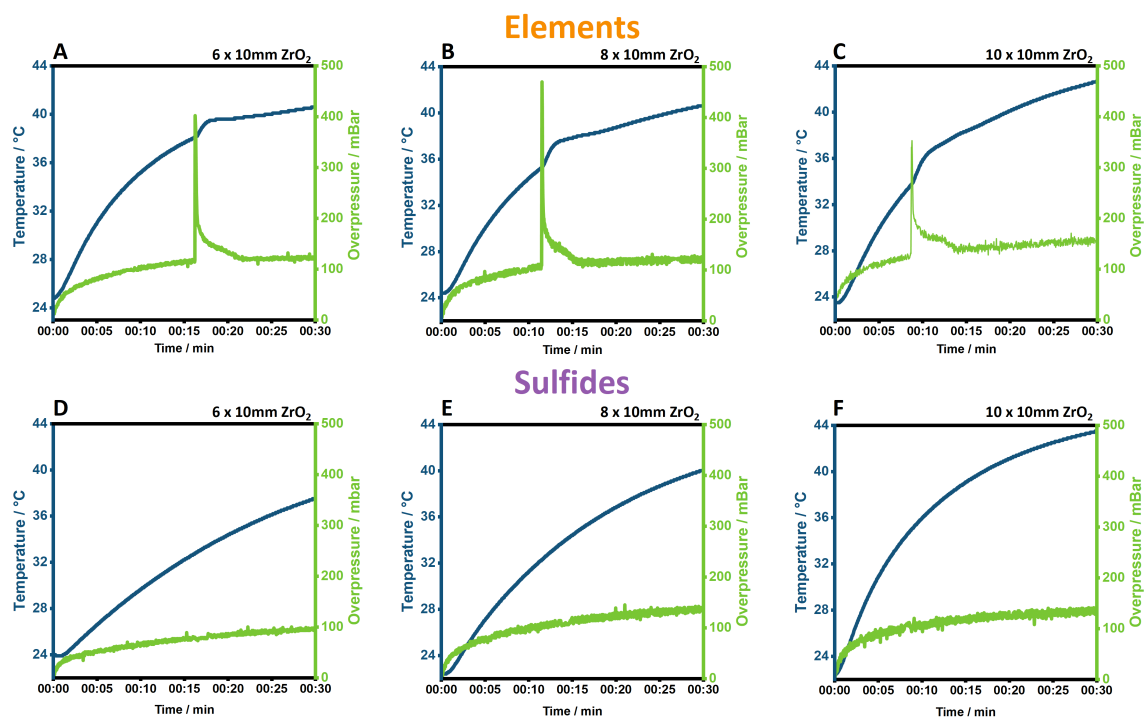

**Fig. S16:** Pressure- and temperature measurements during Pn synthesis employing (A) six 10 mm ZrO<sub>2</sub> balls added to an elemental reaction mixture. (B) eight 10 mm ZrO<sub>2</sub> balls added to an elemental reaction mixture. (C) ten 10 mm ZrO<sub>2</sub> balls added to an elemental reaction mixture. (D) six 10 mm ZrO<sub>2</sub> balls added to a sulfidic reaction mixture. (E) eight 10 mm ZrO<sub>2</sub> balls added to a sulfidic reaction mixture. (F) ten 10 mm ZrO<sub>2</sub> balls added to a sulfidic reaction mixture.

PXRDs of the synthesized Pn materials generated through the Gas and Temperature monitoring experiments

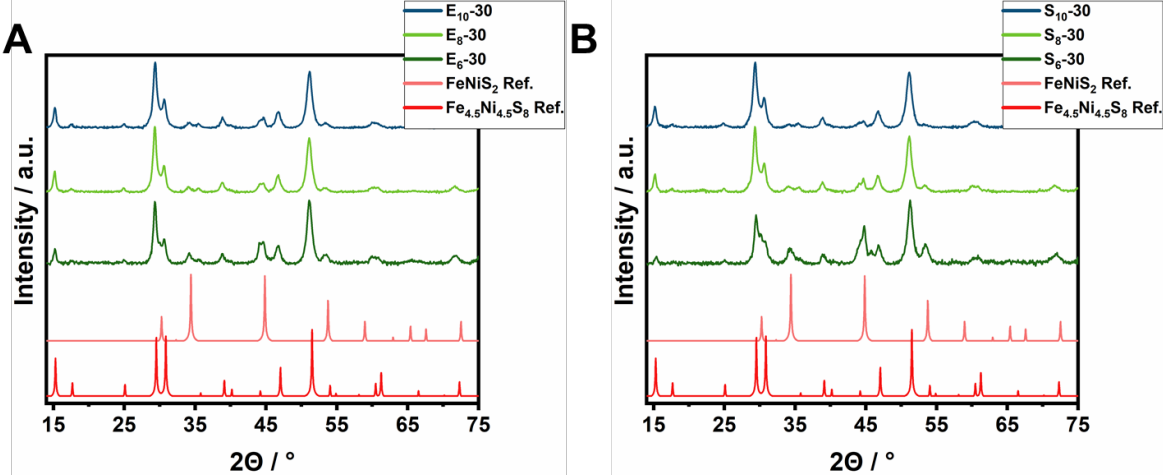

Fig. S17: Powder XRD analysis of the synthesized Pn materials from the pressure- and temperature measurements compared to the reference powder pattern of Fe<sub>4.5</sub>Ni<sub>4.5</sub>S<sub>8</sub><sup>1</sup> and FeNiS<sub>2</sub><sup>2</sup>.

## Raman investigation of the S<sub>8</sub>-Y samples

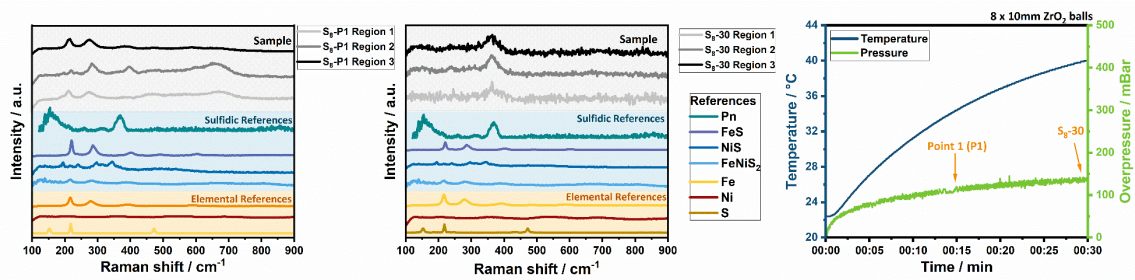

**Fig. S18:** Raman spectra of the obtained S<sub>8</sub>-Y samples at three different time points of the mechanochemical reaction: at the half-point of the mechanochemical reaction (A) and after 30 min of milling (B). The respective points are also shown for clarity in (C).

Electrochemical cell for PEM investigation

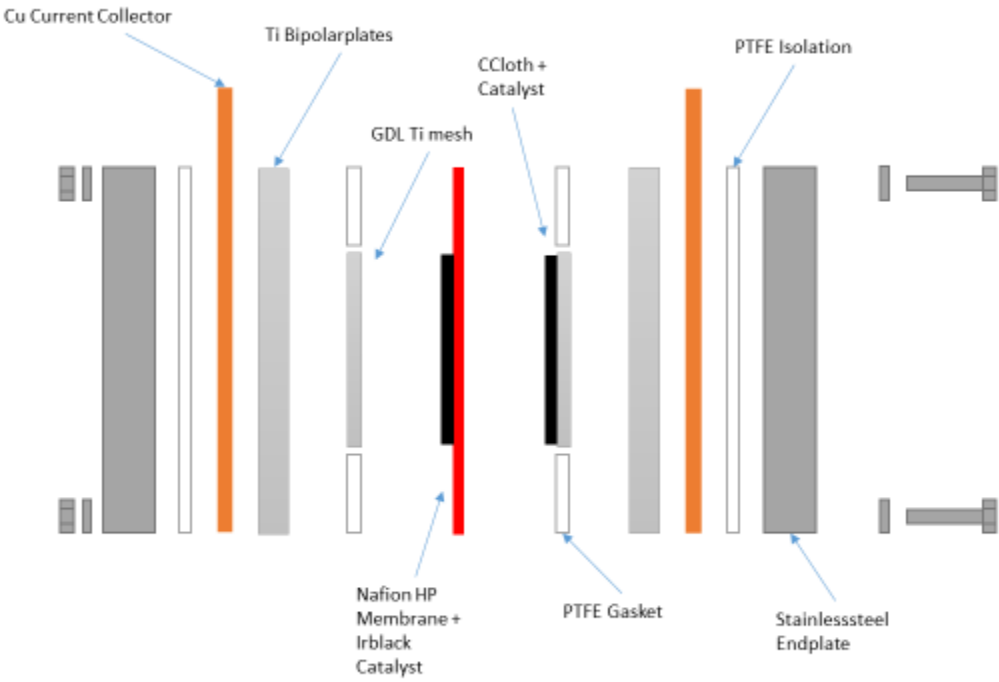

Fig. S19: Schematic presentation of the used PEM electrolyzer.

## Electrochemical HER using the synthesized materials in a PEM electrolyzer

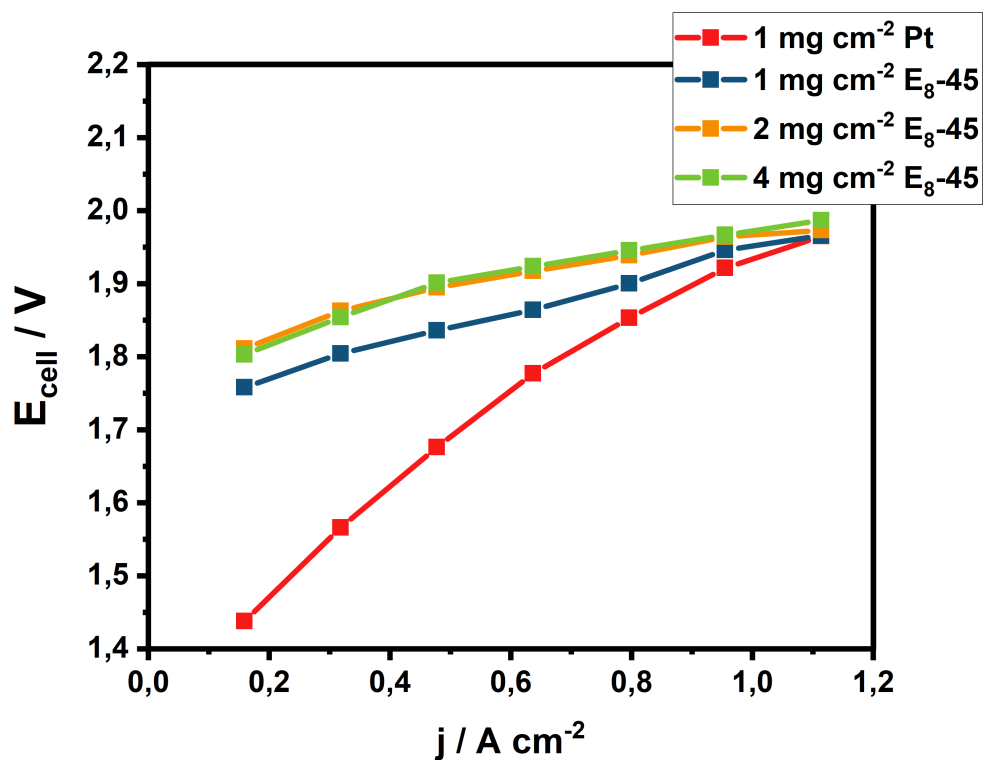

Fig. S20: Polarization curves of Pt/C (1 mg cm<sup>-2</sup> loading) and E<sub>8</sub>-45 with different loadings from 1-4 mg cm<sup>-2</sup> recorded at a temperature of 80 °C (A).

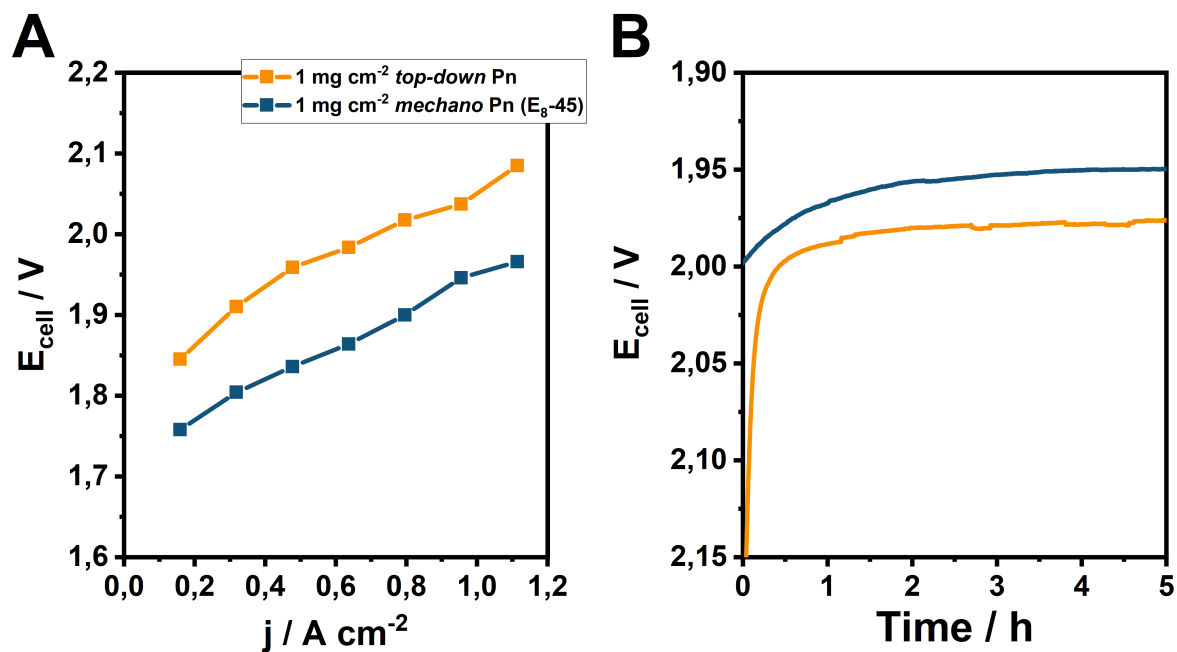

Fig. S21: Polarization curves of top-down synthesized Pn and mechano Pn (E<sub>8</sub>-45) at a catalytic loading of 1 mg cm<sup>-2</sup> recorded at a temperature of 80 °C (A). Chronopotentiometry of top-down synthesized Pn and mechano-Pn (E<sub>8</sub>-45) at a catalytic loading of 1 mg cm<sup>-2</sup> at 80 °C for 5 h at an applied current of 1 A cm<sup>-2</sup> (B).

## References

- 1 A. D. Pearson and M. J. Buerger, *Am. Mineral.*, 1956, **41**, 804.
- 2 N. Alsen, *Geologiska Foereningens i Stockholm Foerhandlingar*, 1925, **47**, 19.
- 3 D. R. Wilburn and W. A. Bassett, *Am. Mineral.*, 1978, **63**, 591.
- 4 J. Zemann, *Acta Cryst.*, 1965, **18**, 139.
- 5 J. D. Grice and R. B. Ferguson, *Canad. Mineral.*, 1974, **12**, 248–252.
- 6 Masayasu Tokonami, Katsuhisa Nishiguchi and Nobuo Morimoto, *Am. Mineral.*, 1972, **57**, 1066.
- 7 A. Sugaki and A. Kitakaze, *Am. Mineral.*, 1998, **83**, 133.
- 8 T. Corrales-Sánchez, *J. Hydrog. Energ.*, 2014, **39**, 20837.
- 9 C. Di Giovanni, Á. Reyes-Carmona, A. Coursier, S. Nowak, J.-M. Grenèche, H. Lecoq, L. Mouton, J. Rozière, D. Jones, J. Peron, M. Giraud, C. Tard, *ACS Catal.*, 2016, **6**, 2626.
- 10 M. Sarno and E. Ponticorvo, *Int. J. Hydrog. Energ.*, 2019, **44**, 4398.
- 11 J. W. D. Ng, T. R. Hellstern, J. Kibsgaard, A. C. Hinckley, J. D. Benck and T. F. Jaramillo, *ChemSusChem*, 2015, **8**, 3512.
- 12 P. K. R. Holzapfel, M. Bühler, D. Escalera-López, M. Bierling, F. D. Speck, K. J. J. Mayrhofer, S. Cherevko, C. V. Pham and S. Thiele, *Small*, 2020, **16**, e2003161.
